1 Sex Differences in Maturation and Attrition of Adult Neurogenesis in the Hippocampus

2

3 Abbreviated title: Sex Differences in Adult Neurogenesis

4

5 Shunya Yagi<sup>1,4</sup>, Jared E.J. Splinter<sup>3,4</sup>, Daria Tai<sup>2</sup>, Sarah Wong<sup>2,4</sup>, Yanhua Wen<sup>2,4</sup> and Liisa  
6 A.M. Galea<sup>1,2,4</sup>

7 Graduate Program in Neuroscience<sup>1</sup>, Department of Psychology<sup>2</sup>, Department of Physics  
8 and Astronomy<sup>3</sup>, Djavad Mowafaghian Centre for Brain Health<sup>4</sup>, University of British  
9 Columbia, Vancouver, BC, V6T 1Z3, Canada

10

11 Author for correspondence:

12 Dr. Liisa Galea

13 Email: [lgalea@psych.ubc.ca](mailto:lgalea@psych.ubc.ca)

14

15 Number of pages:46

16 Number of figures:7

17 Number of tables:2

18 Number of words for abstract:151

19 Number of words for introduction:907

20 Number of words for discussion:2099

21

22 The authors declare no competing financial interests.

23

24 *Acknowledgements*

25 We would like to thank Tanvi Puri, Yanhua Wen, and Stephanie Lieblch for the exceptional  
26 technical assistance with this work. This work was supported by a Natural Sciences and  
27 Engineering Research Council (NSERC) Discovery Grant to LAMG [RGPIN-2018-04301]  
28 and Izaak Walton Killam Memorial Pre-Doctoral Fellowship to SY.

29 ABSTRACT

30 Sex differences exist in the regulation of adult neurogenesis in the hippocampus in  
31 response to hormones and cognitive training. Here we investigated the trajectory and  
32 maturation rate of adult-born neurons in the dentate gyrus (DG) of male and female rats.  
33 Sprague-Dawley rats were perfused two hours, 24 hours, one, two or three weeks after  
34 BrdU injection, a DNA synthesis marker that labels dividing progenitor cells and their  
35 progeny. Adult-born neurons (BrdU/NeuN-ir) matured faster in males compared to females.  
36 Males had a greater density of neural stem cells (Sox2-ir) in the dorsal, but not in the  
37 ventral, DG and had higher levels of cell proliferation (Ki67-ir) than non-proestrous females.  
38 However, males showed a greater reduction in neurogenesis between one and two weeks  
39 after mitosis, whereas females showed similar levels of neurogenesis throughout the  
40 weeks. The faster maturation and greater attrition of new neurons in males compared to  
41 females suggests greater potential for neurogenesis to respond to external stimuli in males  
42 and emphasizes the importance of studying sex on adult hippocampal neurogenesis.

43

44 Significance Statement

45 Previously studies examining the characteristics of adult-born neurons in the  
46 dentate gyrus have used almost exclusively male subjects. Researchers have assumed the  
47 two sexes have a similar maturation and attrition of new neurons in the dentate gyrus of  
48 adults. However, this study highlights notable sex differences in the attrition, maturation rate  
49 and potential of neurogenesis in the adult hippocampus that has significant implications for  
50 the field of neuroplasticity. These findings are important in understanding the relevance of  
51 sex differences in the regulation of neurogenesis in the hippocampus in response to stimuli  
52 or experience and may have consequences for our understanding of diseases that involve  
53 neurodegeneration of the hippocampus, particularly those that involve sex differences, such  
54 as Alzheimer's disease and depression.

## 55 1. Introduction

56 Adult neurogenesis in the dentate gyrus (DG) has been observed in all mammalian  
57 species studied including primates (Kuhn et al., 1996; Gould et al., 1999b; Kornack and  
58 Rakic, 1999; Knoth et al., 2010; Briley et al., 2016; Boldrini et al., 2018; Moreno-Jiménez et  
59 al., 2019). Despite two papers indicating a lack of neurogenesis in humans (Dennis et al.,  
60 2016; Sorrells et al., 2018), recent studies have definitively shown adult neurogenesis  
61 exists in humans and is modulated by disease, age, and perhaps sex in response to  
62 antidepressants (Epp et al., 2013; Cipriani et al., 2018; Sorrells et al., 2018; Moreno-  
63 Jiménez et al., 2019; Tobin et al., 2019). Adult hippocampal neurogenesis arises from the  
64 radial glia-like neural stem cells (RGLs: type1; Figure 1) in the subgranular zone of the DG,  
65 which express stage specific proteins such as Sox2. Sox2 plays a critical role maintaining  
66 pluripotency of RGLs (Steiner et al., 2006; Bonaguidi et al., 2011; Encinas et al., 2011;  
67 Amador-Arjona et al., 2015; Micheli et al., 2018). The RGLs undergo asymmetrical cell  
68 division and generate one RGL and either an astroglia or a transiently amplifying  
69 intermediate neural progenitor cell (IPC: type2). The IPCs can undergo multiple  
70 symmetrical or asymmetrical cell divisions but generally daughter cells differentiate into  
71 neurons (Cameron et al., 1993; Kempermann, 2003; Steiner et al., 2006; Bonaguidi et al.,  
72 2011; Encinas et al., 2011). Previous studies show that adult-born cells in the DG divide  
73 multiple times, increasing the number of daughter cells which peaks one week after initial  
74 mitosis in male rats (Cameron et al., 1993) and perhaps earlier in mice ( Amador-Arjona et  
75 al., 2015). Adult-born cells in the DG start to die off and show a rapid decrease in the  
76 number of new cells between one week and three weeks after the initial cell division in male  
77 rodents (Cameron et al., 1993; Snyder et al., 2009; Encinas et al., 2011). A subset of IPCs  
78 (type2b), neuroblasts (type3) and immature neurons transiently express a microtubule-  
79 associated protein, doublecortin (DCX) for up to three weeks, and new neurons start to  
80 express a neuronal nuclear protein, NeuN, approximately one week after mitosis in rats

81 (Brown et al., 2003; Snyder et al., 2009) or two weeks after mitosis in mice (Snyder et al.,  
82 2009). Surviving new neurons integrate into the existing neural circuitry, and play an  
83 important role in pattern separation and stress resilience (Clelland et al., 2009; Snyder et  
84 al., 2011; Hill et al., 2015; França et al., 2017). However, whereas there are species  
85 differences in the maturation rate of adult born neurons (Snyder et al., 2009), as of yet no  
86 studies to our knowledge have explored sex differences in the maturation rate of adult born  
87 neurons.

88 It is important to acknowledge that most of our information about the trajectory and  
89 timeline of maturation of new neurons comes from data in male rodents (Cameron et al.,  
90 1993; Snyder et al., 2009), with one study in female rodents (Brown et al., 2003). Previous  
91 studies demonstrate notable sex differences in the regulation of adult neurogenesis in  
92 response to stress, estrogens, androgens, or cognitive training in the DG (Falconer and  
93 Galea, 2003; Barker and Galea, 2008; Chow et al., 2013; Hillerer et al., 2013; Yagi et al.,  
94 2016; Duarte-Guterman et al., 2019). For instance, acute stress suppresses adult  
95 neurogenesis in male rats, but not in female rats (Falconer and Galea, 2003; Hillerer et al.,  
96 2013). Furthermore, spatial navigation tasks or spatial pattern separation tasks enhance  
97 adult neurogenesis in male rats but not in female rats (Chow et al., 2013; Yagi et al., 2016).  
98 The enhancing effect of cognitive training on adult neurogenesis in male rats has a critical  
99 period, in which cognitive training must occur 6-10 days after cell birth (Epp et al., 2011),  
100 which is curiously the same time that  $17\beta$ -estradiol also increases neurogenesis in the male  
101 meadow vole (Ormerod et al., 2004). The sex differences in the ability of cognitive training  
102 to enhance neurogenesis in males but not females suggests one of three scenarios: 1)  
103 neurogenesis in the hippocampus is not important for cognitive training in females; 2) the  
104 neural activity in the hippocampus may not be as active in females; or 3) there are sex  
105 differences in the maturation rate of neurogenesis. Either of these scenarios would lead to  
106 the inability of cognitive training to boost survival of new neurons in females in response to

107 spatial training. However, evidence suggests neither of the first two scenarios are correct.  
108 Adult DG neurogenesis is associated with better performance in females (Chow et al.,  
109 2013; Yagi et al., 2016) and females show increased zif268 expression in the CA3 after  
110 training compared to males,(Yagi et al., 2016, 2017).Collectively, these findings suggest sex  
111 differences following cognitive training may be due to differences in the maturation rate and  
112 perhaps trajectory of adult-born neurons in the DG.

113 Therefore, the present study aimed to elucidate whether there were sex differences  
114 in the maturation and attrition of the new neurons as well as the number of neural stem  
115 cells in the dorsal versus ventral DG. A single injection of bromodeoxyuridine (BrdU) was  
116 used for birth-dating of adult-born new cells in male and female rats, and brains were  
117 immunohistochemically stained for BrdU and endogenous cell-stage-specific protein  
118 makers such as Sox2, Ki67, doublecortin (DCX) and NeuN. Given the work above, we  
119 expected sex differences in the maturation rate of new neurons with males showing a faster  
120 maturation rate than females.

## 121 **2. Materials and Methods**

### 122 *2. 1. Animals*

123 Forty-four age-matched (two-month old) *Sprague-Dawley* rats were bred at the  
124 University of British Columbia and used in this study (n=22 per sex). All subjects were  
125 same-sex pair-housed in opaque polyurethane bins (48 × 27 × 20 cm) with paper towels,  
126 polyvinylchloride tube, cedar bedding, under a 12h light/dark cycle with 7 am lights-on.  
127 Food and water were provided *ad libitum*. Females weighed 240-280g and males weighed  
128 315-355g. All animals were handled every day for two minutes for one week prior to the  
129 beginning of the experiment. All experiments were carried out in accordance with Canadian  
130 Council for Animal Care guidelines and were approved by the animal care committee at the  
131 University of British Columbia. All efforts were made to reduce the number of animals used  
132 and their suffering during all procedures.

## 133 2.2. *Experimental design*

134 One intraperitoneal (i.p.) injection of BrdU (200mg/kg) was given to all rats between  
135 11am-12 pm. Rats were perfused either two hours (2h), 24 hours (24h), one week (1w), two  
136 weeks (2w) or three weeks (3w) after the BrdU injection, but otherwise were left  
137 undisturbed except for weekly cage changes (see Figure 1B). On the day of perfusion, rats  
138 were administered an overdose of sodium pentobarbital (500mg/kg, i.p.). Blood samples  
139 were collected from the chest cavity, and rats were perfused transcardially with 60 ml of  
140 0.9% saline followed by 120 ml of 4% paraformaldehyde (Sigma-Aldrich). Brains were  
141 extracted and post-fixed in 4% paraformaldehyde overnight, then transferred to 30%  
142 sucrose (Fisher Scientific) solution for cryoprotection and remained in the solution until  
143 sectioning. Brains were sliced into 30  $\mu$ m coronal sections using a Leica SM2000R  
144 microtome (Richmond Hill, Ontario, Canada). Sections were collected in series of ten  
145 throughout the entire rostral-caudal extent of the hippocampus and stored in anti-freeze  
146 solution consisting of ethylene glycol, glycerol and 0.1M PBS at -20°C until immunostaining.  
147 Complete series of sections were immunohistochemically stained for BrdU/DCX and  
148 BrdU/NeuN to examine sex differences in the maturation timeline of new neurons, for Sox2  
149 to examine the number of neural stem cells, and for Ki67 to examine actively dividing  
150 progenitor cells. In addition, the brain sections were double-stained for BrdU/Sox2 to  
151 examine changes of Sox2 expression over the three weeks after BrdU injection.

## 152 153 2.3. *Radioimmunoassay for 17 $\beta$ -estradiol and testosterone*

154 Previous studies reported that 17 $\beta$ -estradiol increases cell proliferation in females  
155 but not males (Tanapat et al., 1999; Barker and Galea, 2008). Androgens increase survival  
156 of new neurons in males but not in females, but do not influence cell proliferation in either  
157 sex (Spritzer and Galea, 2007; Duarte-Guterman et al., 2019). Thus, we examined serum  
158 levels of 17 $\beta$ -estradiol and testosterone in females and males of the 1w, 2w and 3w groups,

159 respectively. Blood samples were stored at 4°C overnight and centrifuged at 10g for 15  
160 minutes to collect serum. Serum 17β-estradiol levels in female rats and serum testosterone  
161 levels in male rats were assayed using commercially available radioimmunoassay (RIA) kits  
162 from Beckman Coulter (Brea, USA) or MP Biomedicals (Santa Ana, USA) respectively. The  
163 sensitivity of the RIA kits was 0.75 ng/mL for 17β-estradiol and 0.03ng/mL for testosterone.  
164 The intra- and inter-assay coefficient of variation were <8.9% and <12.2% respectively for  
165 17β-estradiol and <8.2% and <13.2% for testosterone. For females with 50 pg/ml or higher  
166 serum estradiol levels were considered to be in proestrus (Cameron et al., 2008). Based on  
167 estradiol levels, none of the females in the 1w, 2w and 3w groups were in proestrus at the  
168 time of sacrifice (see Table 1).

Table 1

Mean (±SEM), minimum and maximum concentration of serum testosterone in males (ng/ml) and estradiol in females (pg/ml). SEM – standard error of the mean n=13 per group

|                     | Min   | Max   | Mean±SEM   |
|---------------------|-------|-------|------------|
| Male (Testosterone) | 0.37  | 4.46  | 1.067±0.43 |
| Female (Estradiol)  | 10.99 | 21.08 | 14.41±1.30 |

#### 169 2. 4. *Estrous cycle stage determination*

170 As the estrous cycle phase can influence cell proliferation (Tanapat et al., 1999;  
171 Rummel et al., 2010), estrous cycle stages of the 2h and 24h groups were determined with  
172 vaginal lavage samples. Vaginal cells suspended in water were obtained using a glass  
173 pipette, transferred onto a microscope slide and stained with cresyl violet (Sigma-Aldrich).  
174 Proestrus was determined when 70% of the cells were nucleated epithelial cells. Two  
175 females (one each in the 2h and 24h groups) were in proestrus at the time of sacrifice.

#### 176 2. 5. *Immunohistochemistry*

##### 177 2. 5. 1. *BrdU/NeuN, BrdU/DCX or BrdU/Sox2 double-staining*

178 The exogenous DNA synthesis marker, 5-bromo-2'-deoxyuridine (BrdU) is  
179 incorporated into DNA during the synthesis phase of the cell cycle (Kee et al., 2002; Miller  
180 et al., 2018). BrdU is a thymidine analogue which is active for two hours after injection in  
181 rats (Cameron and Mckay, 2001). Briefly our protocol was as follows: sections were  
182 prewashed three times with 0.1 M TBS and left overnight at 4 °C. Sections were then  
183 incubated in a primary antibody solution containing 1:250 mouse anti-NeuN (Millipore; MA,  
184 USA), 1:200 goat anti-DCX(Santa Cruz Biotechnology; Dallas, Texas, USA) or 1:500 mouse  
185 anti-Sox2 (Santa Cruz Biotechnnology; Dallas, Texas USA), 0.3% Triton-X, and 3% normal  
186 donkey serum (NDS; Vector Laboratories) in 0.1 M TBS for 24 hours at 4 °C. Next, sections  
187 were incubated in a secondary antibody solution containing 1:250 donkey anti-mouse  
188 ALEXA 488 (Invitrogen, Burlington, ON, Canada) or donkey anti-goat ALEXA 488  
189 (Invitrogen, Burlington, ON, Canada) in 0.1 M TBS, for 18 hours at 4 °C. After being rinsed  
190 three times with TBS, sections were washed with 4% paraformaldehyde for 10 minutes, and  
191 rinsed twice in 0.9% NaCl for 10 minutes, followed by incubation in 2N HCl (Fisher  
192 Scientific, Waltham, Massachusetts, USA) for 30 minutes at 37 °C. Sections were then  
193 rinsed three times in TBS for 10 minutes each and incubated in a BrdU primary antibody  
194 solution consisting of 1:500 rat anti-BrdU (AbD Serotec; Raleigh, NC, USA), 3% NDS, and  
195 0.3% Triton-X in 0.1 M TBS for 24 hours at 4 °C. A further incubation of sections  
196 commenced in a secondary antibody solution containing 1:500 donkey anti-rat ALEXA 594  
197 (Invitrogen, Burlington, ON, Canada) in 0.1 M TBS for 24 hours at 4 °C. Following three  
198 final rinses with TBS, the sections were mounted onto microscope slides and cover-slipped  
199 with PVA DABCO.

#### 200 *2. 5. 2.Ki67 or Sox2 immunofluorescent staining*

201 Ki67 is expressed in actively dividing cells (all stages of the cell cycle except G<sub>0</sub>)  
202 and therefore is expressed at higher levels than BrdU 24 h after injection (Kee et al., 2002).  
203 Randomly selected brain sections were also immunohistochemically stained with anti-Ki67



204 or anti-Sox2 (n=8 per sex). Brain sections were prewashed with 0.1 M PBS and left to sit  
205 overnight at 4 °C. The next day, sections were incubated in 10mM sodium citrate buffer for  
206 45 minutes at 90 °C to retrieve antigens of Ki67 and blocked with 3% NDS and 0.3% Triton-  
207 X in 0.1M PBS, followed by incubation in primary antibody solution made with 1:1000  
208 mouse anti-Sox2 (Santa Cruz Biotechnnology; Dallas, Texas USA) or 1:250 mouse anti-  
209 Ki67 (Leica Biosystems; Newcastle, UK), 1% NDS, and 0.3% Triton-X in 0.1 M PBS for 24  
210 hours at 4 °C. Then the sections were incubated in secondary antibody solution, consisting  
211 of 1:500 Donkey anti-Mouse ALEXA 488 for Sox2 (Invitrogen, Burlington, ON, Canada) and  
212 1:500 Donkey anti-mouse ALEXA 594 for Ki67 (Invitrogen, Burlington, ON, Canada), 1%  
213 NDS, and 0.3% Triton-X in 0.1 M PBS, for 18 hours at 4 °C. After three rinses with PBS,  
214 sections were incubated in 1:5000 DAPI in PBS for 3 mins and mounted onto slides and  
215 cover-slipped with PVA DABCO.

## 216 2. 6. Cell counting

217 All counting was conducted by an experimenter blind to the group assignment of  
218 each animal using an Olympus epifluorescent microscope and confocal microscope.  
219 Location of immunoreactive cells was examined in the dorsal or ventral DG using the  
220 criterion defined by Banasr et al. (2006) with sections 7.20-4.48mm from the interaural line  
221 (Bregma -1.80 to -4.52mm) defined as dorsal and sections 4.48-2.20 mm from the  
222 interaural line (Bregma -4.52 to -6.80mm) as ventral (Banasr et al., 2006; see Figure 1C).  
223 Cells were counted separately in each region because the different regions are associated  
224 with different functions (reviewed in Fanselow and Dong, 2010) and possibly different  
225 maturation timelines (Snyder et al., 2012). The dorsal hippocampus is associated with  
226 spatial learning and memory, whereas the ventral hippocampus is associated with stress  
227 and anxiety (Moser et al., 1993; Kjelstrup et al., 2002).

### 228 2. 6.1. BrdU and Ki67

229 Ki67-ir and BrdU-ir cells were counted under a 100x oil immersion objective lens

230 (Figure 3A, 5A). Every 10<sup>th</sup> section of the granule cell layer (GCL) that includes the  
231 subgranular zone on one half of each brain were counted. An estimate of the total number  
232 of cells was calculated by multiplying the aggregate by 10 (Snyder et al., 2005; Ngwenya et  
233 al., 2015; Workman et al., 2015). Density of BrdU-ir or Ki67-ir cells was calculated by  
234 dividing the total estimate of immunoreactive cells in the GCL by volume of the  
235 corresponding region. The volume of the DG was calculated using Cavalieri's principle  
236 (Gundersen and Jensen, 1987) by multiplying the summed areas of the DG by thickness of  
237 the section (300µm). Area measurements for the DG were obtained using digitized images  
238 on the software ImageJ (NIH).

#### 239 2. 6. 2. *Percentage of BrdU/NeuN, BrdU/DCX and BrdU/Sox2 co-expression*

240 The percentages of BrdU/NeuN and BrdU/DCX-ir cells were obtained by randomly  
241 selecting 50 BrdU-labeled cells and calculating the percentage of cells that co-expressed  
242 DCX, NeuN or Sox2 (Figure 5A, 6A and 7A; method used by Banasr et al., 2006). The  
243 percentage of BrdU/DCX-ir cells was also categorized into the three morphology types  
244 using the criteria used by (Plümpe et al., 2006). Briefly, stages were defined as type-A  
245 proliferative: neurons with no or short plump processes, type-B intermediate: neurons  
246 possess medium-length processes or apical dendrites that reach the molecular layer, and  
247 type-C postmitotic: neurons possess apical dendrites with at least one branching into the  
248 molecular layer (see Figure1D). The density of BrdU-ir cells was multiplied by the  
249 percentage of BrdU-ir cells that expressed DCX or Sox2.

#### 250 2. 6. 3. *Sox2*

251 Photomicrographs of the DG were obtained with a 20x objective lens of an Olympus  
252 confocal microscope (three images from three sections each from the dorsal and ventral  
253 DG; Figure 1C and 2A). Immunoreactive cells were counted automatically using a code  
254 developed by JEJS from the digitized images using MATLAB (MathWorks; Natick,  
255 Massachusetts, USA). The code is available by contacting the author.

## 256 2. 7. Statistical analyses

257 All analyses were conducted using STATISTICA (Statsoft Tulsa, OK). The density of  
258 BrdU-ir cells, BrdU-ir/DCX-ir, or the percentage of BrdU-ir cells that express Sox2 or DCX  
259 were each analyzed using repeated-measures analysis of variance (ANOVA), with  
260 maturation time (2h, 24h, 1w, 2w, 3w) and sex (male, female) as between-subject variables  
261 and with hippocampal region (dorsal, ventral) as the within-subject variable. The  
262 percentage of BrdU-ir cells that express NeuN was analyzed using a repeated-measures  
263 ANOVA, with maturation time (1w, 2w, 3w) and sex (male, female) as between-subject  
264 variables and with hippocampal region (dorsal, ventral) as the within-subject variable.  
265 Repeated-measures ANOVAs were used to each analyze the density of Ki67-ir and Sox2-ir  
266 cells with sex as between subject factor and with hippocampal region as the within-subject  
267 factor. Pearson product-moment correlations were calculated to examine the relationship  
268 between dependent variables of interest. Furthermore, the percentage of BrdU/DCX-ir cells  
269 expressing type-C morphology was analyzed using repeated-measures ANOVA with sex as  
270 between-subject variables and with maturation time and hippocampal region as within-  
271 subject variables. Post-hoc tests utilized the Neuman-Keuls procedure. A priori  
272 comparisons were subjected to Bonferroni corrections. Significance was set to  $\alpha=0.05$  and  
273 effect sizes are given with Cohen's d or partial  $\eta^2$ .

274

## 275 3. Results

### 276 3.1. Males had larger dorsal dentate gyrus volumes compared to females.

277 As expected, males had significantly greater volume of dorsal DG compared to females and  
278 as such cell density was used for direct comparison between the sexes for all analyses [ $p =$   
279 0.012; region by sex interaction:  $F(1,22) = 4.61$ ,  $p = 0.043$ , Cohen's  $d = 1.26$ ; see Table 2].  
280 In addition, the ventral DG was larger than the dorsal DG, as expected [main effect of  
281 region:  $F(1,22) = 36.19$ ,  $p < 0.0001$ ].

Table 2

Mean ( $\pm$ SEM) volume of the dorsal and ventral dentate gyrus in male and female rats ( $\text{mm}^3$ ). Females had a smaller dorsal dentate gyrus volumes. SEM=standard error of the mean, n= 42 (20 males and 22 females)

|        | Dorsal            | Ventral           |
|--------|-------------------|-------------------|
| Male   | 0.905 $\pm$ 0.056 | 1.334 $\pm$ 0.083 |
| Female | 0.688 $\pm$ 0.043 | 1.593 $\pm$ 0.195 |

282

283 *3.2. Male rats, compared to female rats, had a greater density of Sox2-ir cells in the dorsal*  
284 *dentate gyrus. Females had greater density of Sox2-ir cells in the ventral compared to*  
285 *dorsal region.*

286 To examine sex differences in neural stem cells, we investigated the expression of Sox2.  
287 Sox2 is a transcriptional factor that plays a role in maintaining self-renewal of neural stem  
288 cells and is considered a neural stem cell marker. Male rats had a greater density of Sox2-ir  
289 cells compared to female rats in the dorsal DG ( $p = 0.024$ , Cohen's  $d = 1.39$ ; sex by region  
290 [ $F(1,16) = 6.34$   $p = 0.023$ , see Figure 2B). Females had a greater density of Sox2-ir cells in  
291 the ventral DG compared to the dorsal DG ( $p = 0.005$ , Cohen's  $d = 1.10$ ) whereas this  
292 regional difference was not observed in males ( $p = 0.74$ ). There were trends for a main  
293 effect of sex [ $F(1, 16) = 3.67$ ,  $p = 0.074$ ] and region [ $F(1,16) = 4.20$ ,  $p = 0.057$ ].

294

295 *3.3. Males had greater levels of cell proliferation (Ki67) compared to females.*

296 To examine potential sex differences in cell proliferation, we used Ki67, which labels all  
297 cells undergoing mitosis. Males had a greater density of Ki67-ir cells compared to females  
298 [main effect of sex:  $F(1,15) = 13.90$ ,  $p = 0.002$ , Cohen's  $d = 1.80$ ; see Figure 3B]. There  
299 was also a trend of main effect of region [ $F(1, 15) = 3.44$ ,  $p = 0.083$ , partial  $\eta^2 = 0.187$ ], but  
300 no significant interaction ( $p=0.11$ ). Because previous studies have observed the rats in  
301 proestrus have higher levels of cell proliferation (Tanapat et al., 1999; Rummel et al., 2010),  
302 we also examined the relationship between the density of Ki67-ir cells and the levels of

303 17 $\beta$ -estradiol in females, or testosterone in males, but none was observed (all ps' > 0.268).

304

305 *3.4. Males, but not females, show greater attrition of BrdU-ir cells from 1 week to 2 weeks*  
306 *after mitosis*

307 To determine whether there were sex differences in the trajectory of new neurons across  
308 weeks we examined the density of BrdU-ir cells at various time points after BrdU injection  
309 (2h, 24h, 1w, 2w, and 3w). Using the same timeline with <sup>3</sup>H-thymidine, males show an  
310 increase <sup>3</sup>H-thymidine-labelled cells after 24 hours and a large attrition rate of <sup>3</sup>H-thymidine-  
311 labelled from one week to three weeks after injection (Cameron et al., 1993). Consistent  
312 with past research (Cameron et al., 1993), males had a greater density of 1w old BrdU-ir  
313 cells compared to 2h, 24h, 2w and 3w after BrdU injection (p's < 0.001; interaction effect of  
314 sex by time [F(4,31) = 2.95, p = 0.035, partial  $\eta^2$  = 0.276; see Figure 4A]). However, females  
315 did not show appreciable differences in the density of BrdU-ir cells across any time points  
316 (all p's > 0.147) except between 2h and 24h (p = 0.156). Furthermore, males had a greater  
317 density of BrdU-ir cells than females at the 1w timepoint (p = 0.0003, Cohen's d = 2.26) but  
318 not at any other timepoint (all ps' > 0.308). Given our findings with Ki67, we also examined  
319 sex differences at the 2h and 24h timepoints and saw males had more BrdU-ir cells in the  
320 dorsal region only at 2h (priori: p=0.009, Cohen's d = 2.64) which failed to reach  
321 significance at 24 h (p=0.15) compared to females. There were main effects of sex [F(1, 31)  
322 = 17.57, p < 0.002, Cohen's d = 0.746], time [F(4, 31) = 11.78, p < 0.0001, partial  $\eta^2$  =  
323 0.603] and region [F(1, 31) = 4.43, p = 0.044, Cohen's d = 0.254] and an interaction effect  
324 of region by time [F(4, 31) = 12.21, p < 0.0001, partial  $\eta^2$  = 0.639] was noted but no other  
325 significant interactions (p's > 0.125).

326

327 Complementing the attrition rate in BrdU-ir cells across weeks in males, we found that  
328 males had a greater density of BrdU/DCX-ir cells than females only at the 1w time point

329 (p=0.00036, Cohen's d = 2.61) but not at any other timepoint (all p's > 0.130 [interaction  
330 effect of sex by time:  $F(4, 29) = 4.04$ ,  $p = 0.0101$ , partial  $\eta^2 = 0.358$ ; see Figure 4B]. Given  
331 our findings with Ki67, we also examined the 2h and 24h timepoint and found that males  
332 had a greater density of BrdU/DCX-ir cells compared to females in the dorsal dentate gyrus  
333 at 2h ( $p = 0.005$ , Cohen's d = 3.18). There were also main effects of sex [ $F(1,29) = 11.71$ ,  $p$   
334 = 0.0047, Cohen's d = 0.320], time [ $F(4, 29) = 29.31$ ,  $p < 0.0001$ , partial  $\eta^2 = 0.802$ ] and  
335 region [ $F(1, 29) = 8.66$ ,  $p = 0.0063$ , partial  $\eta^2 = 0.230$ ] and an interaction effect of region by  
336 time [ $F(4, 29) = 12.86$ ,  $p < 0.0001$ ], partial  $\eta^2 = 0.639$ ] but no other significant interactions  
337 were noted (p's > 0.269).

338

### 339 *3.5. Male adult-born neurons mature faster compared to female adult-born neurons.*

340 We then examined whether there are sex differences in maturation rate of adult-born  
341 neurons by examining the percentage of BrdU-ir cells expressing maturation stage specific  
342 neuronal markers, immature neurons (DCX) and mature neurons (NeuN) across the three  
343 weeks. Males, compared to females, had a greater percentage of BrdU-ir cells that  
344 expressed NeuN 2w ( $p = 0.003$ , Cohen's d = 2.14) but not 1w ( $p=0.99$ ) or 3w ( $p=0.54$ ) after  
345 BrdU injection (interaction effect of sex by time [ $F(2, 17) = 3.52$ ,  $p = 0.05$ , partial  $\eta^2 = 0.293$ ;  
346 see Figure 5B]). There were also main effects of sex: [ $F(1, 17) = 7.14$ ,  $p = 0.016$ , partial  $\eta^2 =$   
347 0.296] and time [ $F(2, 16) = 41.92$ ,  $p < 0.00001$ , partial  $\eta^2 = 0.834$ ] but no other significant  
348 main or interaction effects (all p's > 0.24). The percentage of BrdU-ir cells that expressed  
349 NeuN by three weeks after BrdU injection in both males and females was approximately  
350 90% and did not significantly differ between the sexes ( $p = 0.583$ ).

351

352 As expected, in both sexes across both regions, the percentage of BrdU-ir cells that also  
353 express DCX decreased significantly as time progressed with the least co-expression at 3w  
354 compared to all other time points (all p's <0.002). Furthermore, the 2h timepoint had lower

355 co-expression than all other earlier timepoints (all p's <0.024) except 2w (p=0.34) and 3 w  
356 [main effect of time:  $F(4, 30) = 63.69$ ,  $p < 0.0001$ ; partial  $\eta^2 = 0.895$ ; see Figure 6B].  
357 Females had greater percentage of BrdU-ir cells that co-expressed DCX in 24h group  
358 compared to 2h group (a priori:  $p = 0.0003$ , Cohen's  $d = 6.68$ ; see Figure 6B), which was  
359 not seen in males ( $p = 0.895$ ; sex by time interaction ( $p = 0.086$ )). There were no other  
360 significant main or interaction effects on the percentage of BrdU-ir cells that co-express  
361 DCX ( $p$ 's > 0.12). Given the findings showing that new neurons expressed NeuN faster in  
362 males compared to females, we also examined BrdU/DCX-ir cells by maturation stage,  
363 which we classified using morphology (Plümpe et al., 2006). Consistent with our  
364 BrdU/NeuN findings, males had a greater percentage of BrdU/DCX-ir cells expressing type-  
365 C morphology compared to females at 2w in the dorsal DG [a priori:  $p = 0.017$ , Cohen's  $d =$   
366  $1.84$ ; effect of time:  $F(2, 18) = 5.39$ ,  $p = 0.015$ , partial  $\eta^2 = 0.37$ ; see Figure 6C) but not at  
367 1w ( $p = 0.95$ ) or 3w ( $p = 0.84$ ) after BrdU injection.

368

369 *3.6. Males have a greater density of BrdU/Sox2-ir cells in the dorsal DG at 2h compared to*  
370 *females.*

371 To understand if there are differences between sexes in the time course of neural stem cell  
372 marker expression after mitosis, we examined the density of BrdU/Sox2-ir cells at 2h, 24h,  
373 1w, 2w and 3w after BrdU injection. Males had a greater density of BrdU/Sox2-ir cells  
374 compared to females in the dorsal dentate gyrus at 2h but not at any other timepoint [a  
375 priori:  $p = 0.0019$ ; see Figure 7B]. In addition, the dorsal dentate gyrus had a greater  
376 density of BrdU/Sox2-ir cells at 2h and 24h than the ventral dentate gyrus compared to all  
377 other timepoints (all p's <0.0003; interaction of region by time  $F(4, 31) = 11.66$ ,  $p < 0.0001$ ,  
378 partial  $\eta^2 = 0.601$ ). There were also significant main effects of time ( $F(4, 31) = 40.46$ ,  $p <$   
379  $0.0004$ , partial  $\eta^2 = 0.84$ ) and region ( $F(1, 31) = 20.50$ ,  $p < 0.0001$ , partial  $\eta^2 = 0.398$ ) but  
380 no other main or interaction effects (both p's >0.109).

381

382 *3.7. The percentage of BrdU/Sox2 co-expressing cells decreased dramatically over time in*  
383 *both sexes*

384 As expected, the percentage of BrdU-ir cells expressing Sox2 decreased across time, with  
385 the highest levels at the 2h and 24h timepoints in the dorsal and ventral region (all p's <  
386 0.0002), with the 2h timepoint having higher levels than 24h in the dorsal dentate gyrus only  
387 (p = 0.003; interaction effect of region by time:  $F(4, 31) = 4.25$ , p = 0.007, partial  $\eta^2 = 0.354$ ;  
388 main effect of region:  $F(1, 31) = 5.37$ , p = 0.027, partial  $\eta^2 = 0.148$ ; main effect of time:  $F(4,$   
389  $31) = 640.85$ , p < 0.001, partial  $\eta^2 = 0.988$ ; see Figure 7C]. There was a trend for an  
390 interaction effect of region by sex [ $F(1, 31) = 3.77$ , p = 0.061, partial  $\eta^2 = 0.108$ ]. There were  
391 no other significant main or interaction effects on the percentage of BrdU-ir cells expressing  
392 Sox2 (p > 0.317).

393

394 *4. Discussion*

395 Our findings indicate that adult-born neurons mature faster in males compared to  
396 females. We also found notable sex differences in the attrition or survival rate of BrdU-ir  
397 cells across weeks, with males showing reductions across time, and females showing no  
398 appreciable reduction in the density of BrdU-ir cells across the three weeks. Furthermore,  
399 males had a higher density of dorsal neural stem cells (Sox2) and cell proliferation (Ki67)  
400 compared to females. There were notable differences in early expression of DCX in  
401 females, but not in males, showing a greater percentage of BrdU-ir cells expressing DCX at  
402 24h compared to 2h. Intriguingly, the density of BrdU-ir cells 2 weeks after production was  
403 comparable between males and females. Although a tremendous amount of research has  
404 unveiled the characteristics of neurogenesis in the adult hippocampus, these findings  
405 underscore that we cannot assume that the same characteristics will be similar in females  
406 as they are in males.

407



408 *4.1. Male adult-born dentate granule cells mature faster compared to female adult-born*  
409 *dentate granule cells*

410 We found that adult born neurons mature faster in males than in females, with males  
411 showing a rapid increase in the percentage of BrdU-ir cells that expressed NeuN at 2  
412 weeks. Although previous studies did not directly compare the sexes, they are consistent  
413 with our results (Brown et al., 2003; Snyder et al., 2009). These studies showed that in  
414 male rats 65-75% of BrdU-ir cells expressed NeuN two weeks after BrdU injection (Snyder  
415 et al., 2009), whereas a separate study found in female rats less than 10% of BrdU-ir cells  
416 expressed NeuN at two weeks after BrdU injection (Brown et al., 2003). Sex differences in  
417 the maturation time course of new neurons may be due to sex differences in the neural  
418 activity of the hippocampal network. Maturation of adult-born neurons is accelerated by  
419 electrophysiological activity in the hippocampus (Piatti et al., 2011), and cFos expression in  
420 the dorsal CA3 of hippocampus is greater in males compared to females in response to a  
421 Morris water maze task and radial arm maze task (Yagi et al., 2016, 2017). However, in the  
422 same studies, females show greater activation of zif268 in the dorsal CA3 compared to  
423 males, which is inconsistent with the interpretation of greater activity in the hippocampus  
424 accounting for the sex differences in maturation timelines. Another possible explanation for  
425 the higher percentage of more mature adult-born neurons in males compared to females at  
426 two weeks may involve competition and/or apoptosis resulting in part from the greater  
427 attrition from one to two weeks in males, which may impact the survival rate of new neurons  
428 (Bergami and Berninger, 2012). Further research is needed to examine the mechanisms of  
429 the sex differences in the maturation of new neurons.

430

431 *4.2. Males had more neural stem cells than females, whereas females showed a regional*  
432 *difference with more neural stem cells in the ventral, compared to dorsal, dentate gyrus.*

433 In the present study, males had a greater density of Sox2-ir cells in the dorsal DG

434 compared to females. We also found that females had a greater density of Sox2-ir cells in  
435 the ventral compared to the dorsal region, that was not observed in males. To our  
436 knowledge, neither of these findings have been reported previously. These findings suggest  
437 that within females, there is more chance of maintaining pluripotency in the ventral  
438 compared to the dorsal DG. How this might be reflected in sex differences in the functions  
439 attributed to the dorsal versus ventral hippocampus remains to be determined. However,  
440 there are some intriguing possibilities as males generally show better spatial learning  
441 (Jonasson, 2005; Voyer et al., 2017), whereas females show different stress reactions  
442 compared to males (Young and Korszun, 2010). Indeed, one study has shown that classical  
443 conditioning using shock as the unconditioned stimulus, did increase neurogenesis in the  
444 ventral DG of females but not males (Dalla et al., 2009). Our results emphasize the  
445 importance of further investigation of sex differences in the preservation of neural stem cells  
446 in the hippocampus is a potential treatment (Briley et al., 2016).

447

448 *4.3. The neural progenitor cell-type composition changes after mitosis with sex-dependent*  
449 *manner.*

450 Consistent with past studies, we found similar percentages of Sox2-ir cells and DCX-ir cells  
451 in the progenitor proliferating pool in male rodents (Sibbe et al., 2015; Nickell et al., 2017).  
452 However, we found that females had a greater increase in the percentages of BrdU-ir cells  
453 co-expressing DCX between two and 24 hours after mitosis whereas males did not exhibit  
454 any significant change between these two timepoints. This finding suggests that the neural  
455 progenitor cell-type composition within the actively dividing pool in females changes after  
456 each cell division more so than in males. It also suggests that early on in division, the  
457 daughter cells proceed more rapidly through the neuronal cell lineage in females compared  
458 to males. This finding may in part explain the ability of females to compensate for the lower  
459 levels of cell proliferation to end up with a similar number of new neurons at three weeks

460 compared to males. More studies are needed to examine sex differences in the timeline  
461 and mechanism of the transition of proliferating progenitors to new neurons for a  
462 comprehensive understanding of the regulation of neural progenitor cell pool in males and  
463 females.

464

#### 465 *4.4. Neurogenesis in males has a different trajectory compared to females*

466 The present study found that males, but not females, showed substantial changes in the  
467 density of BrdU-ir cells across timepoints with an early increase from 24 hours to one week  
468 followed by a substantial decrease from one to two weeks. The decrease was notable such  
469 that despite the fact that males showed greater density of one week old BrdU-ir cells than  
470 females, but there was no sex differences in density of older (two-three week) old BrdU-ir  
471 cells. Our findings are consistent with previous studies that demonstrating the same  
472 trajectory in male Sprague Dawley rats (Cameron et al., 1993; Snyder et al., 2009, 2012)  
473 and no significant sex difference in the amount of two week or three week old BrdU-ir cells  
474 in cage controls (Tanapat et al., 1999; Barha et al., 2011; Chow et al., 2013 but see Lee et  
475 al., 2014). Collectively these results suggest that males and females regulate adult  
476 neurogenesis differently as males produce more new cells and show greater attrition of  
477 these new cells, whereas females produce fewer new cells which are preserved across  
478 maturation. These findings may explain why spatial learning and or estrogens given during  
479 the first week of new neuron development increases the survival of new neurons in males,  
480 but not in females (Ormerod et al., 2004; Epp et al., 2007; Chow et al., 2013; Yagi et al.,  
481 2016). Taken together, these results suggest that spatial training between one week and  
482 two weeks after production of new neurons can prevent the attrition of adult-born neurons in  
483 males but perhaps not in females.

484

#### 485 *4.5. Males, compared to females, had greater cell proliferation in the dentate gyrus.*

486 Males had a greater density of Ki67-ir cells in the DG compared to females, consistent with  
487 findings in meadow voles (Galea and McEwen, 1999). In contrast a number of other studies  
488 have not found sex differences in cell proliferation in the DG (Lagace et al., 2007;  
489 Brummelte and Galea, 2010; Barha et al., 2011; Spritzer et al., 2017). However, these  
490 inconsistencies may be related to estrous cycle, as only proestrous females show greater  
491 cell proliferation than male rats (Tanapat et al., 1999), although this effect has not always  
492 been noted (Lagace et al., 2007). None of the females in the Ki67 analysis were in  
493 proestrus and thus, we would expect lower levels of cell proliferation in these females.  
494 Consistent with our Ki67 results we also see increased BrdU-ir cells at 2h in males  
495 compared to females, but no differences at 24h, which likely has to do with the population  
496 that Ki67 labels versus the pulsatile BrdU (Kee et al., 2002).

497

#### 498 *4.6. Conclusion*

499 In the present study, sex differences are noted in the neural stem cell population, cell  
500 proliferation, maturation rate and the attrition rate of adult-born neurons in the  
501 hippocampus. The trajectory of new neuron survival is dramatically different in males  
502 compared to females suggesting that the ability to influence neurogenesis within each sex  
503 may be due to the existing differences in timing and/or maturation of new neurons. Future  
504 studies should target mechanisms of these sex differences in adult neurogenesis as there  
505 are likely multiple factors involved that could profoundly affect these sex differences such as  
506 genetic (four core genotypes; 66), epigenetic (Sase et al., 2019) and mitochondrial  
507 functions (Biala et al., 2011) that differ between the sexes. These findings have profound  
508 implications for our understanding of adult neurogenesis in the DG, the use of therapeutics  
509 that modulate neurogenesis in the general population and underscore the need to include  
510 both sexes in research on hippocampal neurogenesis.

511 *References*

- 512 Amador-Arjona A, Cimadamore F, Huang C-T, Wright R, Lewis S, Gage FH, Terskikh A V.  
513 (2015) SOX2 primes the epigenetic landscape in neural precursors enabling proper  
514 gene activation during hippocampal neurogenesis. *Proc Natl Acad Sci* 112:E1936–  
515 E1945.
- 516 Banasr M, Soumier A, Hery M, Mocaër E, Daszuta A (2006) Agomelatine, a New  
517 Antidepressant, Induces Regional Changes in Hippocampal Neurogenesis. *Biol*  
518 *Psychiatry* 59:1087–1096.
- 519 Barha CK, Brummelte S, Lieblich SE, Galea LAM (2011) Chronic restraint stress in  
520 adolescence differentially influences hypothalamic-pituitary-adrenal axis function and  
521 adult hippocampal neurogenesis in male and female rats. *Hippocampus* 21:1216–  
522 1227.
- 523 Barker JM, Galea LAM (2008) Repeated estradiol administration alters different aspects of  
524 neurogenesis and cell death in the hippocampus of female, but not male, rats.  
525 *Neuroscience* 152:888–902.
- 526 Bergami M, Berninger B. (2012). A fight for survival: the challenges faced by a newborn  
527 neuron integrating in the adult hippocampus. *Dev Neurobiol.* 72:1016-31. doi:  
528 10.1002/dneu.22025.
- 529 Biala YN, Bogoch Y, Bejar C, Linial M, Weinstock M (2011) Prenatal stress diminishes  
530 gender differences in behavior and in expression of hippocampal synaptic genes and  
531 proteins in rats. *Hippocampus* 21:1114–1125.
- 532 Boldrini M, Fulmore CA, Tartt AN, Simeon LR, Pavlova I, Poposka V, Rosoklija GB, Stankov  
533 A, Arango V, Dwork AJ, Hen R, Mann JJ (2018) Human Hippocampal Neurogenesis  
534 Persists throughout Aging. *Cell Stem Cell* 22:589-599.e5.
- 535 Bonaguidi MA, Wheeler MA, Shapiro JS, Stadel RP, Sun GJ, Ming GL, Song H (2011) In  
536 vivo clonal analysis reveals self-renewing and multipotent adult neural stem cell  
537 characteristics. *Cell* 145:1142–1155.
- 538 Briley D, Ghirardi V, Woltjer R, Renck A, Zolochovska O (2016) Preserved neurogenesis in  
539 non- demented individuals with AD neuropathology. *Sci Rep* 6:1–10  
540 <http://dx.doi.org/10.1038/srep27812>.
- 541 Brown JP, Couillard-Després S, Cooper-Kuhn CM, Winkler J, Aigner L, Kuhn HG (2003)  
542 Transient Expression of Doublecortin during Adult Neurogenesis. *J Comp Neurol*  
543 467:1–10.
- 544 Brummelte S, Galea LAM (2010) Chronic high corticosterone reduces neurogenesis in the  
545 dentate gyrus of adult male and female rats. *Neuroscience* 168:680–690.
- 546 Cambiasso MJ, Cisternas CD, Ruiz-Palmero I, Scerbo MJ, Arevalo MA, Azcoitia I, Garcia-  
547 Segura LM (2017) Interaction of sex chromosome complement, gonadal hormones and  
548 neuronal steroid synthesis on the sexual differentiation of mammalian neurons. *J*  
549 *Neurogenet* 31:300–306.

- 550 Cameron HA, Mckay RDG (2001) Adult neurogenesis produces a large pool of new granule  
551 cells in the dentate gyrus. *J Comp Neurol* 435:406–417.
- 552 Cameron HA, Woolley CS, McEwen BS, Gould E (1993) Differentiation of newly born  
553 neurons and glia in the dentate gyrus of the adult rat. *Neuroscience* 56:337–344.
- 554 Cameron N, Corpo A Del, Diorio J, Mcallister K, Sharma S, Meaney MJ (2008) Maternal  
555 Programming of Sexual Behavior and Hypothalamic-Pituitary-Gonadal Function in the  
556 Female Rat. 3.
- 557 Chow C, Epp JR, Lieblich SE, Barha CK, Galea LAM (2013) Sex differences in  
558 neurogenesis and activation of new neurons in response to spatial learning and  
559 memory. *Psychoneuroendocrinology* 38:1236–1250.
- 560 Cipriani S, Ferrer I, Aronica E, Kovacs GG, Verney C, Nardelli J, Khung S, Delezoide AL,  
561 Milenkovic I, Rasika S, Manivet P, Benifla JL, Deriot N, Gressens P, Adle-Biassette H  
562 (2018) Hippocampal radial glial subtypes and their neurogenic potential in human  
563 fetuses and healthy and Alzheimer’s disease adults. *Cereb Cortex* 28:2458–2478.
- 564 Clelland CD, Choi M, Romberg C, Clemenson GD, Fragniere A, Tyers P, Jessberger S,  
565 Saksida LM, Barker RA, Gage FH, Bussey TJ (2009) A functional role for adult  
566 hippocampal neurogenesis in spatial pattern separation. *Science* (80- ) 325:210–213.
- 567 Dalla C, Papachristos EB, Whetstone AS, Shors TJ (2009) Female rats learn trace  
568 memories better than male rats and consequently retain a greater proportion of new  
569 neurons in their hippocampi. *Proc Natl Acad Sci U S A* 106:2927–2932.
- 570 Dennis C V., Suh LS, Rodriguez ML, Kril JJ, Sutherland GT (2016) Human adult  
571 neurogenesis across the ages: An immunohistochemical study. *Neuropathol Appl*  
572 *Neurobiol* 42:621–638.
- 573 Duarte-Guterman P, Lieblich S, Wainwright SR, Chow C, Chaiton J, Watson N V, Galea  
574 LAM (2019) Androgens enhance adult hippocampal neurogenesis in males but not  
575 females in an age-dependent manner. *Endocrinology* 160:2128–2136.
- 576 Encinas JM, Michurina T V, Peunova N, Park J-H, Tordo J, Peterson DA, Fishell G,  
577 Koulakov A, Enikolopov G (2011) Division-coupled astrocytic differentiation and age-  
578 related depletion of neural stem cells in the adult hippocampus. *Cell Stem Cell* 8:566–  
579 579.
- 580 Epp JR, Beasley CL, Galea LAM (2013) Increased hippocampal neurogenesis and p21  
581 expression in depression: Dependent on antidepressants, sex, age, and antipsychotic  
582 exposure. *Neuropsychopharmacology* 38:2297–2306.
- 583 Epp JR, Haack AK, Galea LAM (2011) Activation and survival of immature neurons in the  
584 dentate gyrus with spatial memory is dependent on time of exposure to spatial learning  
585 and age of cells at examination. *Neurobiol Learn Mem* 95:316–325.
- 586 Epp JR, Spritzer MD, Galea LAM (2007) Hippocampus-dependent learning promotes  
587 survival of new neurons in the dentate gyrus at a specific time during cell maturation.  
588 *Neuroscience* 149:273–285.

- 589 Falconer EM, Galea LAM (2003) Sex differences in cell proliferation, cell death and  
590 defensive behavior following acute predator odor stress in adult rats. *Brain Res*  
591 975:22–36.
- 592 Fanselow MS, Dong HW (2010) Are the Dorsal and Ventral Hippocampus Functionally  
593 Distinct Structures? *Neuron* 65:7–19.
- 594 França TFA, Bitencourt AM, Maximilla NR, Barros DM, Monserrat JM (2017) Hippocampal  
595 neurogenesis and pattern separation: A meta-analysis of behavioral data.  
596 *Hippocampus* 27:937–950.
- 597 Galea LAM, McEwen BS (1999) Sex and seasonal differences in the rate of cell  
598 proliferation in the dentate gyrus of adult wild meadow voles. *Neuroscience* 89:955–  
599 964.
- 600 Gould E, Reeves A, Graziano M, Gross C (1999) Neurogenesis in the neocortex of adult  
601 primates. *Science* 286:548–552.
- 602 Gundersen HJ, Jensen EB (1987) The efficiency of systematic sampling in stereology and  
603 its prediction. *J Microsc* 147:229–263.
- 604 Hill AS, Sahay A, Hen R (2015) Increasing Adult Hippocampal Neurogenesis is Sufficient to  
605 Reduce Anxiety and Depression-Like Behaviors. *Neuropsychopharmacology* 40:2368–  
606 2378.
- 607 Hillerer KM, Neumann ID, Couillard-Despres S, Aigner L, Slattery DA (2013) Sex-  
608 dependent regulation of hippocampal neurogenesis under basal and chronic stress  
609 conditions in rats. *Hippocampus* 23:476–487.
- 610 Jonasson Z (2005) Meta-analysis of sex differences in rodent models of learning and  
611 memory: a review of behavioral and biological data. *Neurosci Biobehav Rev* 28:811–  
612 825.
- 613 Kee N, Si S, Boonstra R, Wojtowicz JM (2002) The utility of Ki-67 and BrdU as proliferative  
614 markers of adult neurogenesis. *J Neurosci Methods* 115:97–105.
- 615 Kempermann G (2003) Early determination and long-term persistence of adult-generated  
616 new neurons in the hippocampus of mice. *Development* 130:391–399.
- 617 Kjelstrup KG, Tuvnes FA, Steffenach H-A, Murison R, Moser EI, Moser M-B (2002)  
618 Reduced fear expression after lesions of the ventral hippocampus. *Proc Natl Acad Sci*  
619 *U S A* 99:10825–10830.
- 620 Knoth R, Singec I, Ditter M, Pantazis G, Capetian P, Meyer RP, Horvat V, Volk B,  
621 Kempermann G (2010) Murine features of neurogenesis in the human hippocampus  
622 across the lifespan from 0 to 100 years. *PLoS One* 5:e8809.
- 623 Kornack DR, Rakic P (1999) Continuation of neurogenesis in the hippocampus of the adult  
624 macaque monkey. *Proc Natl Acad Sci U S A* 96:5768–5773.
- 625 Kuhn HG, Dickinson-Anson H, Gage FH (1996) Neurogenesis in the dentate gyrus of the  
626 adult rat: age-related decrease of neuronal progenitor proliferation. *J Neurosci*  
627 16:2027–2033.

- 628 Lagace DC, Fischer SJ, Eisch AJ (2007) Gender and endogenous levels of estradiol do not  
629 influence adult hippocampal neurogenesis in mice. *Hippocampus* 17:175–180.
- 630 Lee TTY, Wainwright SR, Hill MN, Galea LAM, Gorzalka BB (2014) Sex, drugs, and adult  
631 neurogenesis: Sex-dependent effects of escalating adolescent cannabinoid exposure  
632 on adult hippocampal neurogenesis, stress reactivity, and amphetamine sensitization.  
633 *Hippocampus* 24:280–292.
- 634 Micheli L, Ceccarelli M, D'Andrea G, Costanzi M, Giacobazzo G, Coccorello R, Caruso C,  
635 Tirone F (2018) Fluoxetine or Sox2 reactivate proliferation-defective stem and  
636 progenitor cells of the adult and aged dentate gyrus. *Neuropharmacology* 141:316–  
637 330.
- 638 Miller I, Min M, Yang C, Tian C, Gookin S, Carter D, Spencer SL (2018) Ki67 is a Graded  
639 Rather than a Binary Marker of Proliferation versus Quiescence. *Cell Rep* 24:1105-  
640 1112.e5.
- 641 Moreno-jiménez EP, Flor-garcía M, Terreros-roncal J, Rábano A, Cafini F, Pallas-bazarra N,  
642 Ávila J, Llorens-martín M (2019) Adult hippocampal neurogenesis is abundant in  
643 neurologically healthy subjects and drops sharply in patients with Alzheimer's disease.  
644 *Nat Med* 25 Available at: <http://dx.doi.org/10.1038/s41591-019-0375-9>.
- 645 Moser E, Moser MB, Andersen P (1993) Spatial learning impairment parallels the  
646 magnitude of dorsal hippocampal lesions, but is hardly present following ventral  
647 lesions. *J Neurosci* 13:3916–3925.
- 648 Ngwenya LB, Heyworth NC, Shwe Y, Moore TL, Rosene DL (2015) Age-related changes in  
649 dentate gyrus cell numbers, neurogenesis, and associations with cognitive impairments  
650 in the rhesus monkey. *Front Syst Neurosci* 9:1–16.
- 651 Nickell CRG, Peng H, Hayes DM, Chen KY, McClain JA, Nixon K (2017) Type 2 neural  
652 Progenitor cell activation Drives reactive neurogenesis after Binge-like alcohol  
653 exposure in adolescent Male rats. *Front Psychiatry* 8:1–14.
- 654 Ormerod BK, Lee T.-Y, Galea LA. (2004) Estradiol enhances neurogenesis in the dentate  
655 gyri of adult male meadow voles by increasing the survival of young granule neurons.  
656 *Neuroscience* 128:645–654.
- 657 Piatti VC, Davies-Sala MG, Espósito MS, Mongiat LA, Trincherro MF, Schinder AF (2011)  
658 The timing for neuronal maturation in the adult hippocampus is modulated by local  
659 network activity. *J Neurosci* 31:7715–7728
- 660 Plümpe T, Ehninger D, Steiner B, Klempin F, Jessberger S, Brandt M, Römer B, Rodriguez  
661 GR, Kronenberg G, Kempermann G (2006) Variability of doublecortin-associated  
662 dendrite maturation in adult hippocampal neurogenesis is independent of the regulation  
663 of precursor cell proliferation. *BMC Neurosci* 7:1–14.
- 664 Rummel J, Epp JR, Galea LAM (2010) Estradiol does not influence strategy choice but  
665 place strategy choice is associated with increased cell proliferation in the hippocampus  
666 of female rats. *Horm Behav* 58:582–590.



- 667 Sase AS, Lombroso SI, Santhumayor BA, Wood RR, Lim CJ, Neve RL, Heller EA (2019)  
668 Sex-Specific Regulation of Fear Memory by Targeted Epigenetic Editing of Cdk5. *Biol*  
669 *Psychiatry* 85:623–634 Available at: <https://doi.org/10.1016/j.biopsych.2018.11.022>.
- 670 Schnell E, Long TH, Bensen AL, Washburn EK, Westbrook GL (2014) Neuroligin-1  
671 knockdown reduces survival of adult-generated newborn hippocampal neurons. *Front*  
672 *Neurosci* 8:1–7.
- 673 Sibbe M, Kuner E, Althof D, Frotscher M (2015) Stem- and Progenitor Cell Proliferation in  
674 the Dentate Gyrus of the Reeler Mouse. *PLoS One* 10:e0119643.
- 675 Snyder JS, Choe JS, Clifford M a, Jeurling SI, Hurley P, Brown A, Kamhi JF, Cameron H a  
676 (2009) Adult-born hippocampal neurons are more numerous, faster maturing, and more  
677 involved in behavior in rats than in mice. *J Neurosci* 29:14484–14495.
- 678 Snyder JS, Ferrante SC, Cameron HA (2012) Late Maturation of Adult-Born Neurons in the  
679 Temporal Dentate Gyrus. *PLoS One* 7:e48757.
- 680 Snyder JS, Hong NS, McDonald RJ, Wojtowicz JM (2005) A role for adult neurogenesis in  
681 spatial long-term memory. *Neuroscience* 130:843–852 Available at:  
682 <http://www.sciencedirect.com/science/article/pii/S0306452204009285> [Accessed  
683 December 30, 2014].
- 684 Snyder JS, Soumier A, Brewer M, Pickel J, Cameron HA (2011) Adult hippocampal  
685 neurogenesis buffers stress responses and depressive behaviour. *Nature* 476:458–  
686 461.
- 687 Sorrells SF, Paredes MF, Cebrian-Silla A, Sandoval K, Qi D, Kelley KW, James D, Mayer S,  
688 Chang J, Auguste KI, Chang EF, Gutierrez AJ, Kriegstein AR, Mathern GW, Oldham  
689 MC, Huang EJ, Garcia-Verdugo JM, Yang Z, Alvarez-Buylla A (2018) Human  
690 hippocampal neurogenesis drops sharply in children to undetectable levels in adults.  
691 *Nature* 555:377–381.
- 692 Spritzer MD, Galea LAM (2007) Testosterone and dihydrotestosterone, but not estradiol,  
693 enhance survival of new hippocampal neurons in adult male rats. *Dev Neurobiol*  
694 67:1321–1333.
- 695 Spritzer MD, Panning AW, Engelman SM, Prince WT, Casler AE, Georgakas JE, Jaeger  
696 ECB, Nelson LR, Roy EA, Wagner BA (2017) Seasonal and sex differences in cell  
697 proliferation, neurogenesis, and cell death within the dentate gyrus of adult wild-caught  
698 meadow voles. *Neuroscience* 360:155–165.
- 699 Steiner B, Klempin F, Wang L, Kott M, Kettenmann H, Kempermann G (2006) Type-2 cells  
700 as link between glial and neuronal lineage in adult hippocampal neurogenesis. *Glia*  
701 54:805–814.
- 702 Tanapat P, Hastings NB, Reeves AJ, Gould E (1999) Estrogen Stimulates a Transient  
703 Increase in the Number of New Neurons in the Dentate Gyrus of the Adult Female Rat.  
704 *J Neurosci* 19:5792–5801.
- 705 Tashiro A, Sandler VM, Toni N, Zhao C, Gage FH (2006) NMDA-receptor-mediated, cell-

706 specific integration of new neurons in adult dentate gyrus. *Nature* 442:929–934.  
707 Tobin MK, Musaraca K, Disouky A, Shetti A, Bheri A, Honer WG, Kim N, Dawe RJ, Bennett  
708 DA, Arfanakis K, Lazarov O (2019) Human Hippocampal Neurogenesis Persists in  
709 Aged Adults and Alzheimer’s Disease Patients. *Cell Stem Cell* 24:974-982.e3.  
710 Voyer D, Voyer SD, Saint-Aubin J (2017) Sex differences in visual-spatial working memory:  
711 A meta-analysis. *Psychon Bull Rev* 24:307–334.  
712 Workman JL, Chan MYT, Galea LAM (2015) Prior high corticosterone exposure reduces  
713 activation of immature neurons in the ventral hippocampus in response to spatial and  
714 nonspatial memory. *Hippocampus* 25:329–344.  
715 Yagi S, Chow C, Lieblisch SE, Galea LAM (2016) Sex and strategy use matters for pattern  
716 separation, adult neurogenesis, and immediate early gene expression in the  
717 hippocampus. *Hippocampus* 26:87–101.  
718 Yagi S, Drewczynski D, Wainwright SR, Barha CK, Hershorn O, Galea LAM (2017) Sex and  
719 estrous cycle differences in immediate early gene activation in the hippocampus and  
720 the dorsal striatum after the cue competition task. *Horm Behav* 87:69–79.  
721 Young E, Korszun A (2010) Sex, trauma, stress hormones and depression. *Mol Psychiatry*  
722 15:23–28.  
723

## 724 Figure Captions

725

726 Figure 1. (A) Schematic illustrations for the timeline of neural stem cell lineage with expression of stage-  
727 specific proteins (Steiner et al., 2006; Bonaguidi et al., 2011; Encinas et al., 2011; Amador-Arjona et al.,  
728 2015; Micheli et al., 2018). (B-D) Schematic illustrations for the experimental design: (B) The experimental  
729 timeline, All animals were age-matched and received BrdU injection at 10 weeks. (C) examples of the  
730 dorsal (section (i): red; Bregma -3.8mm), and ventral (section (ii): blue; Bregma -6.8mm) hippocampus  
731 (numbers represent mm from the bregma) and (D) morphological phenotypes of DCX-ir cells. H- hours, w-  
732 weeks, BrdU- bromodeoxyuridine, DCX- doublecortin, GCL- granule cell layer, IPC- intermediate  
733 proliferating cell, ML- molecular layer, RGL- radial glial cell, SGZ- subgranular zone

734

735 Figure 2. Sex differences in neural stem cells (Sox2-ir). (A) Photomicrographs of Sox2 (green) with DAPI  
736 (blue) taken with 10x objective lens from a male (left) and female (right) young adult rat (11 weeks old) in  
737 the dorsal dentate gyrus. (B) Mean (+SEM) density of Sox2-ir cells: Males, compared to females, had a  
738 greater density of Sox2-ir cells in the dorsal dentate gyrus. The ventral dentate gyrus of females, but not  
739 males, had a greater density of Sox2-ir cells compared to the dorsal dentate gyrus. \* indicates a significant  
740 sex differences and + indicates significant a regional difference ( $p < 0.05$ ). ir- immunoreactive, SEM-  
741 standard error of the mean. All animals were age-matched and received BrdU injection at 10 weeks.

742

743 Figure 3. Sex differences in proliferating cells (Ki67-ir) in the dentate gyrus. (A) Photomicrographs of Ki67  
744 (Red) with DAPI (blue) taken with x40 objective from a male (left) and female (right) young adult rat (11  
745 weeks old) in the dorsal dentate gyrus. (B) Mean (+SEM) density of Ki67-ir cells: Males had a greater  
746 density of Ki67-ir cells compared to females. \* indicates a significant difference ( $p < 0.05$ ). ir-  
747 immunoreactive, SEM-standard error of the mean. All animals were age-matched.

748

749 Figure 4. Sex differences in the trajectory of adult-born BrdU-ir cells. (A) Mean ( $\pm$ SEM) density of BrdU-ir  
750 cells. Male adult rats had a greater density of BrdU-ir cells at 2h and 1w compared to female adult rats and  
751 showed a greater reduction in density between 1w and 2w after BrdU injection. (B) Mean ( $\pm$ SEM) density  
752 of BrdU/DCX-ir cells. Males had a greater density of BrdU-ir cells that express DCX cells at 2h and 1w. \*  
753 indicates a significant sex difference ( $p < 0.05$ ). h-hours, w-weeks, BrdU- bromodeoxyuridine, DCX-  
754 doublecortin, SEM-standard error of the mean. All animals were age-matched and received BrdU injection  
755 at 10 weeks.

756

757 Figure 5. Sex differences in the maturation rate of adult-born neurons in the dentate gyrus (BrdU/NeuN).  
758 (A) Photomicrographs of BrdU (red)/NeuN (green) taken with 60x objective lens from a male (left) and  
759 female (right) young adult rats in the 2w group. (B) Mean ( $\pm$ SEM) percentages of BrdU-ir cells that express  
760 NeuN. Male young adult rats had a greater percentage of BrdU-ir cells that express NeuN at 2w in the  
761 dorsal and ventral dentate gyrus. \* indicates a significant sex difference ( $p < 0.05$ ). w-weeks, BrdU-  
762 bromodeoxyuridine, ir- immunoreactive, SEM-standard error of the mean. All animals were age-matched

763 and received BrdU injection at 10 weeks old.

764

765 Figure 6. Sex differences in the maturation rate of adult-born neurons in the dentate gyrus (BrdU/DCX).  
766 (A) Photomicrographs of BrdU (Red)/DCX (Green) taken from male young adult rat at 24h (left: 60x  
767 objective lens) and 2w (right: 40x objective lens) group. (B) Mean ( $\pm$ SEM) percentages of BrdU-ir cells that  
768 express DCX. There was no significant sex difference in the percentage of BrdU-ir cells that co-express  
769 DCX (C) Mean ( $\pm$ SEM) percentages of BrdU/DCX-ir cells that had a type-C morphological phenotype. A  
770 priori comparisons showed that male adult rats had a greater percentage of BrdU/DCX-ir cells that showed  
771 the type-C morphological phenotype at 2w compared to female adult rats in the dorsal dentate gyrus. \*  
772 indicates a significant sex difference ( $p < 0.05$ ). h-hours, w-weeks, BrdU- bromodeoxyuridine, DCX-  
773 doublecortin, ir- immunoreactive. All animals were age-matched and received BrdU injection at 10 weeks  
774 old.

775

776 Figure 7. Sex differences in BrdU/Sox2-ir cells across timepoints. (A) Photomicrographs of BrdU (left:  
777 red) /Sox2-ir (center: green) cells and merged images (right), taken from a male young adult rat in 24h  
778 group. (B) Mean ( $\pm$ SEM) density of BrdU-ir cells that express Sox2. A priori comparisons showed that  
779 male, compared to female, young adult rats had a greater density of BrdU-ir cells that co-expressed  
780 Sox2 in the dorsal dentate gyrus at 2h after BrdU injection. \* indicates a significant sex difference  
781 ( $p < 0.05$ ). BrdU- bromodeoxyuridine, ir- immunoreactive, SEM-standard error of the mean. All animals  
782 were age-matched and received BrdU injection at 10 weeks old.

783

784 Figure 1

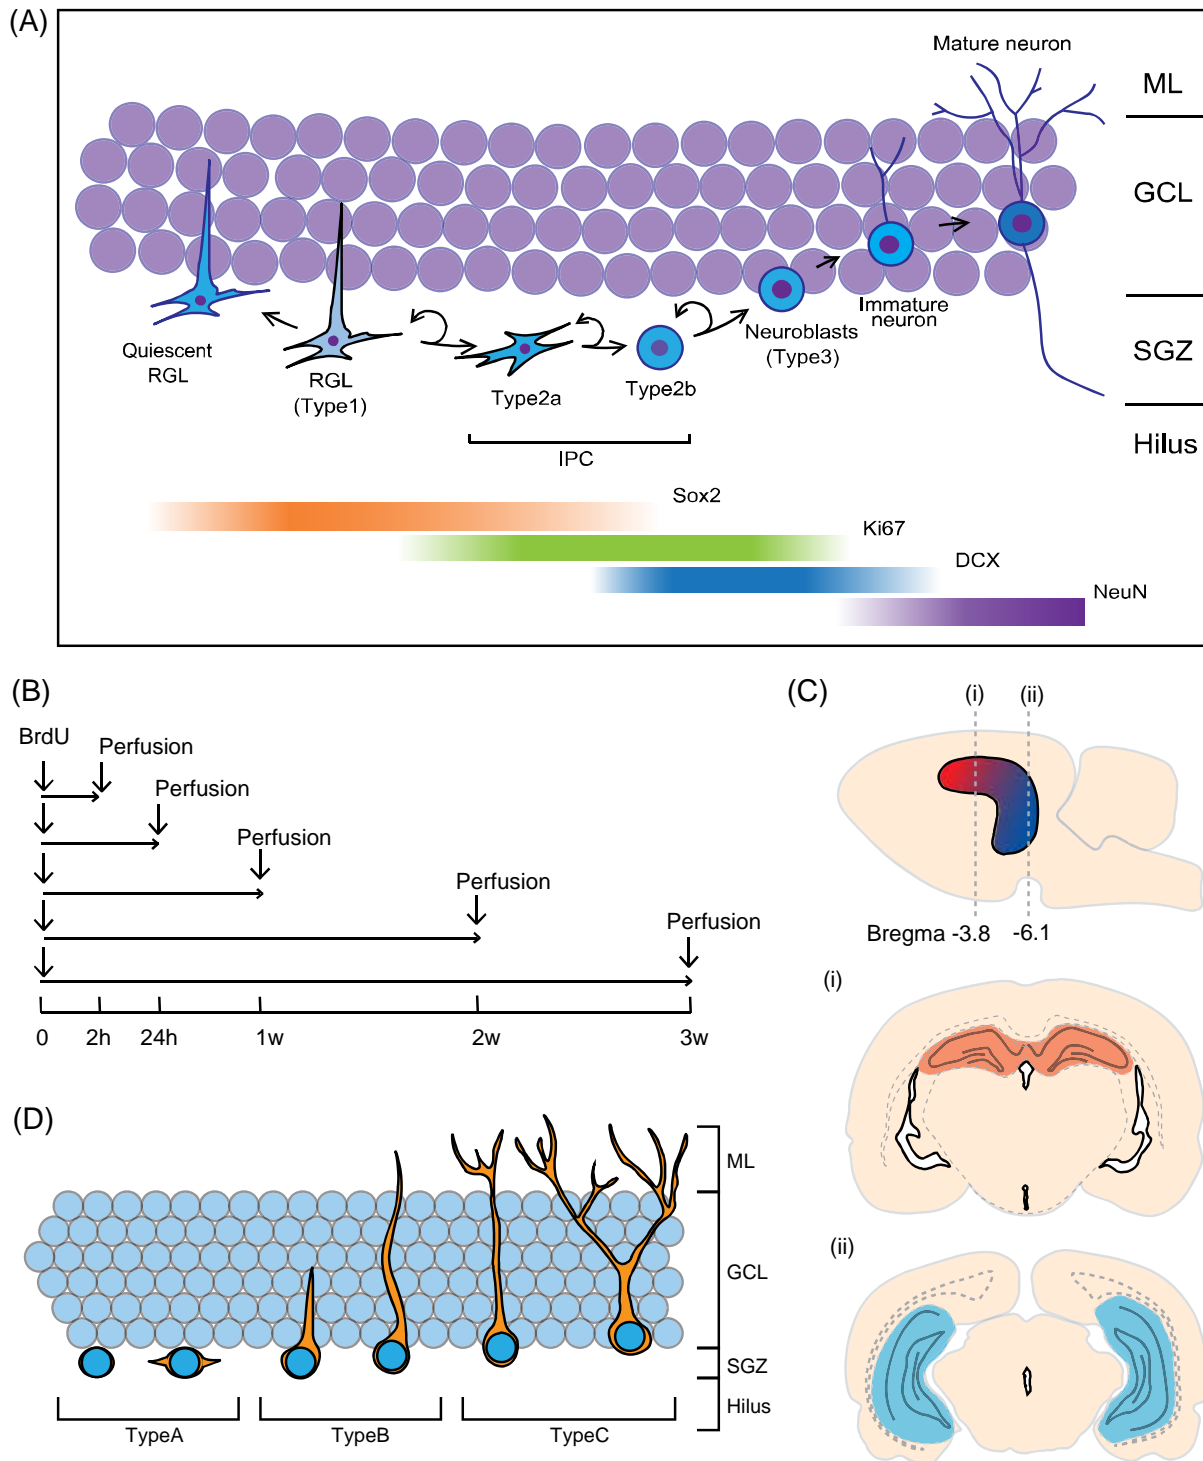

785 Figure 2

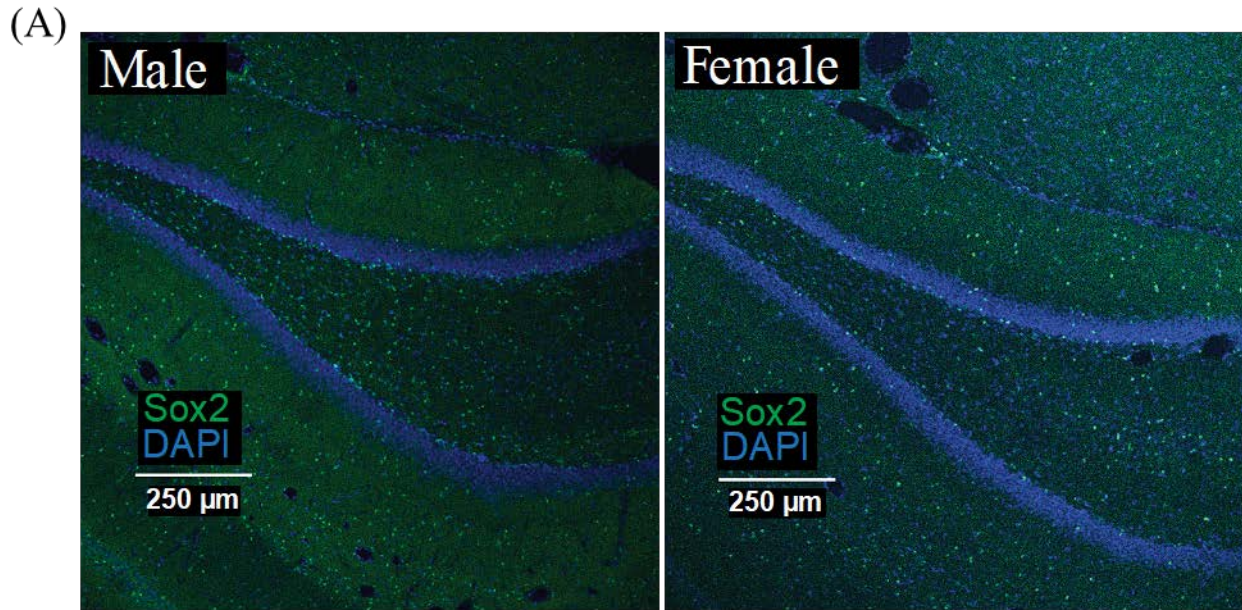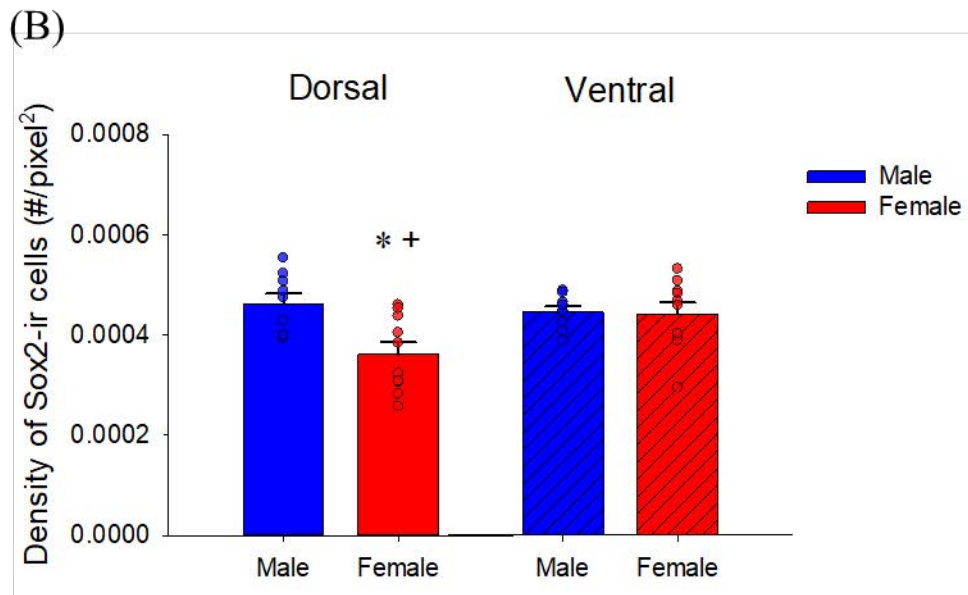

786

787 Figure 3

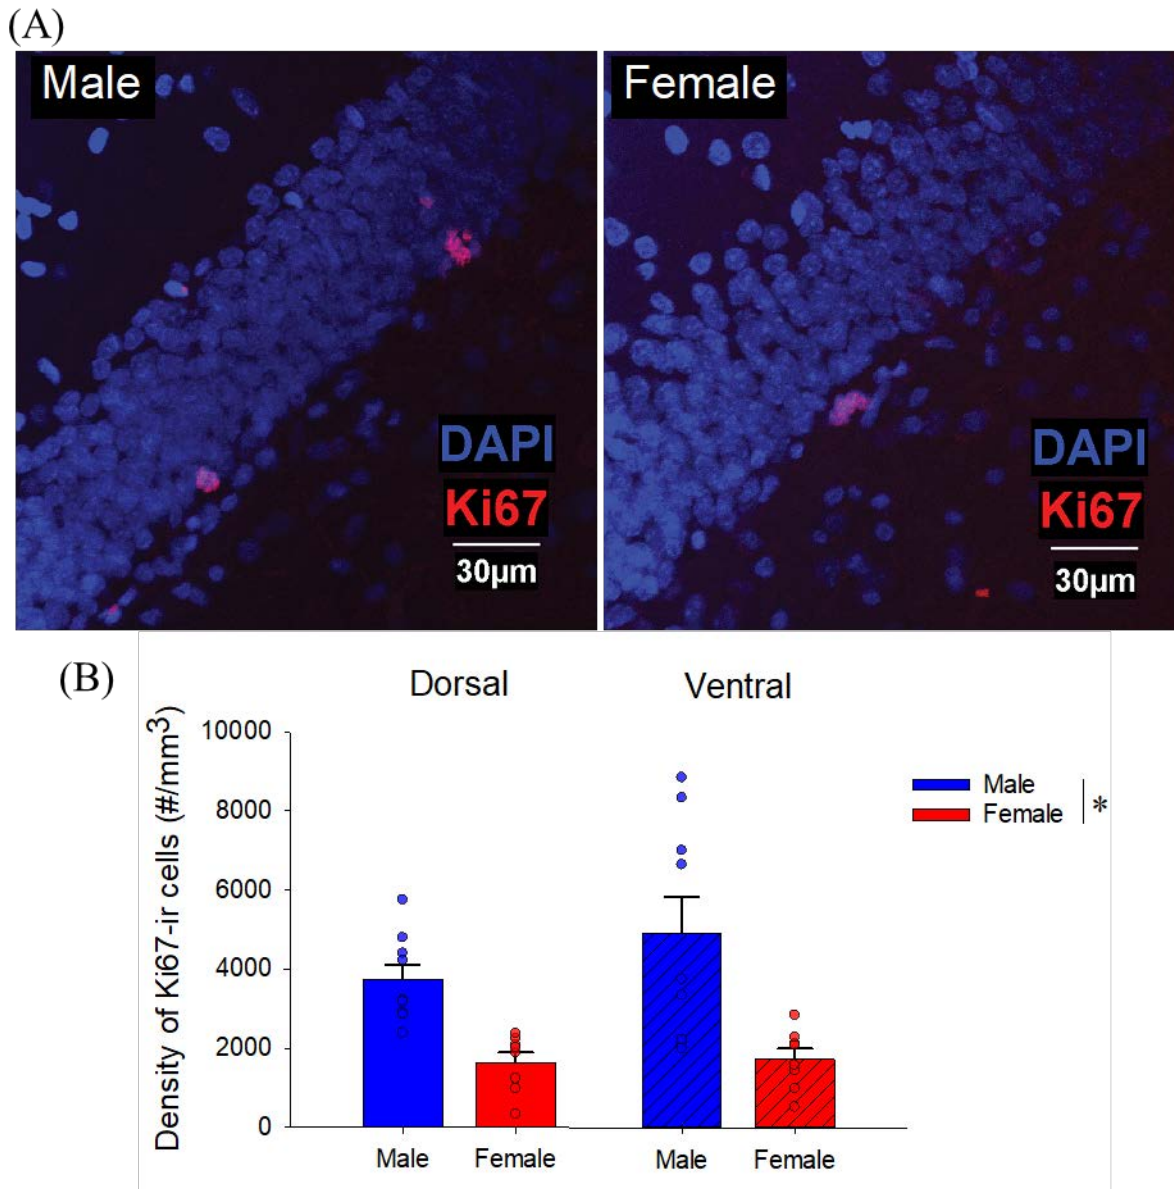

788

789 Figure 4

(A)

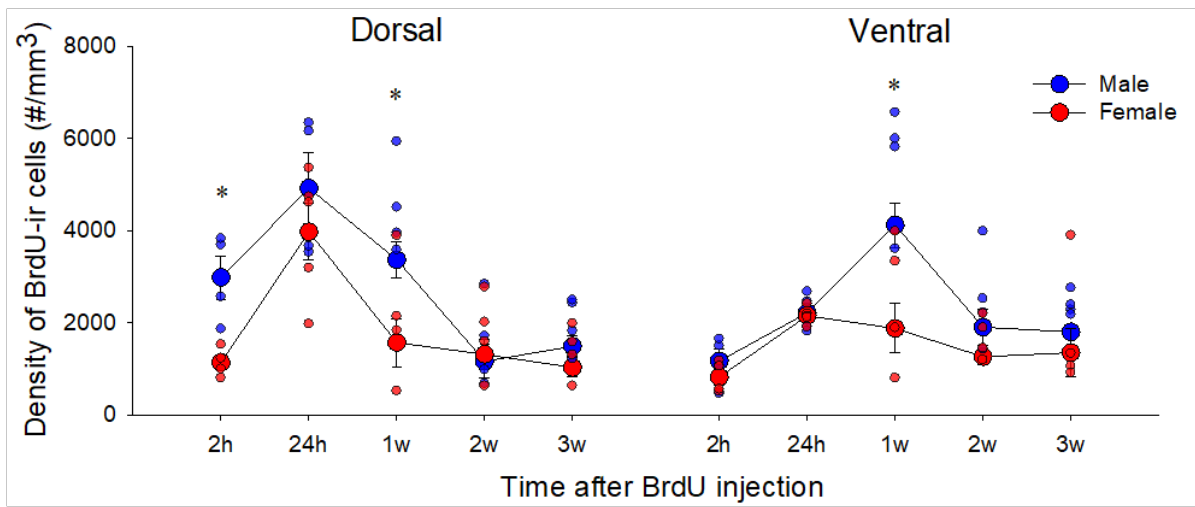

(B)

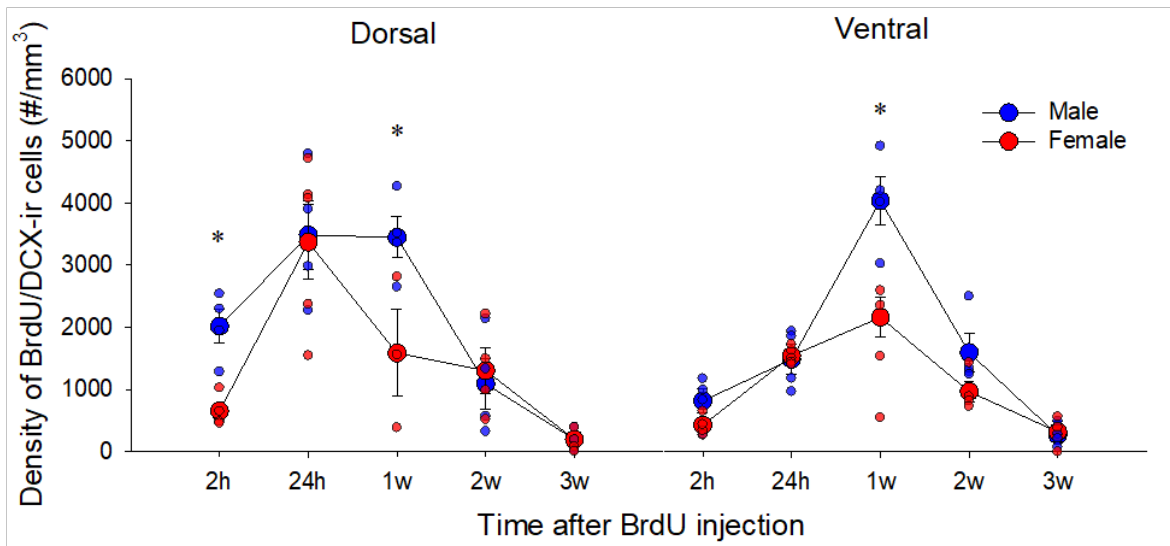

790



791 Figure 5

792

(A)

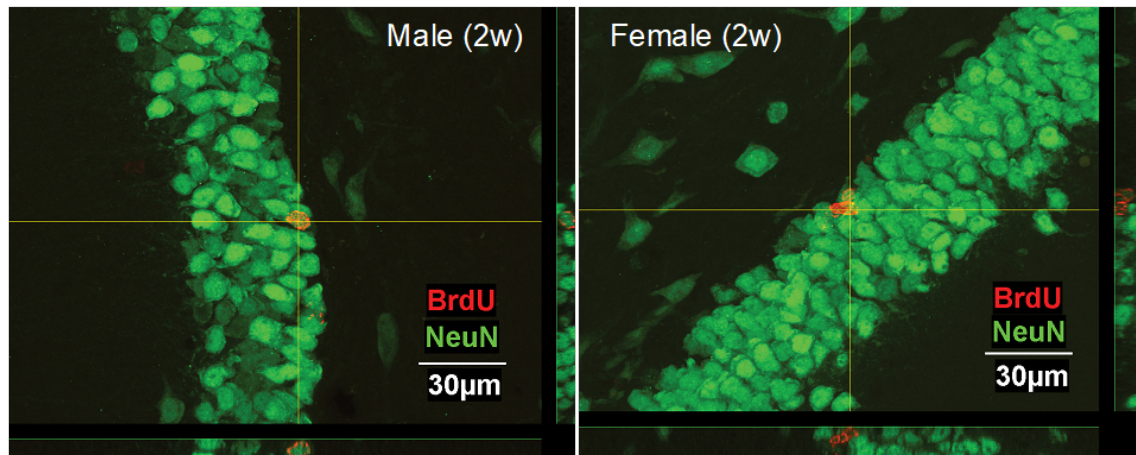

(B)

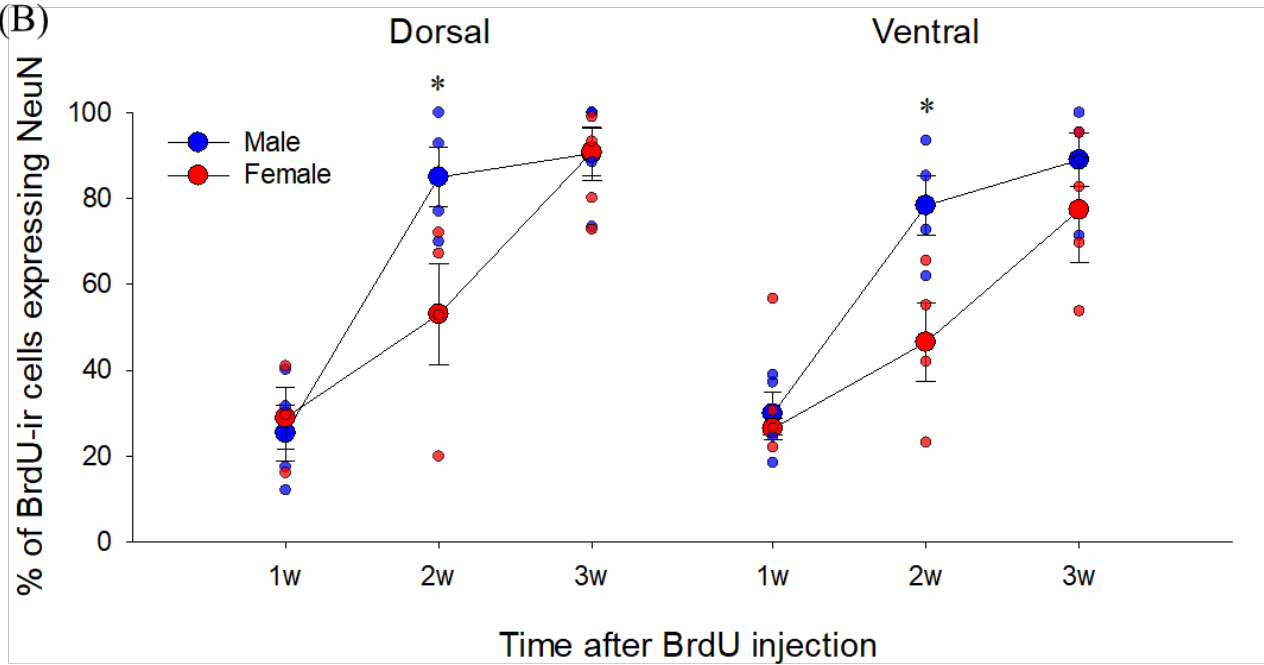

793 Figure 6

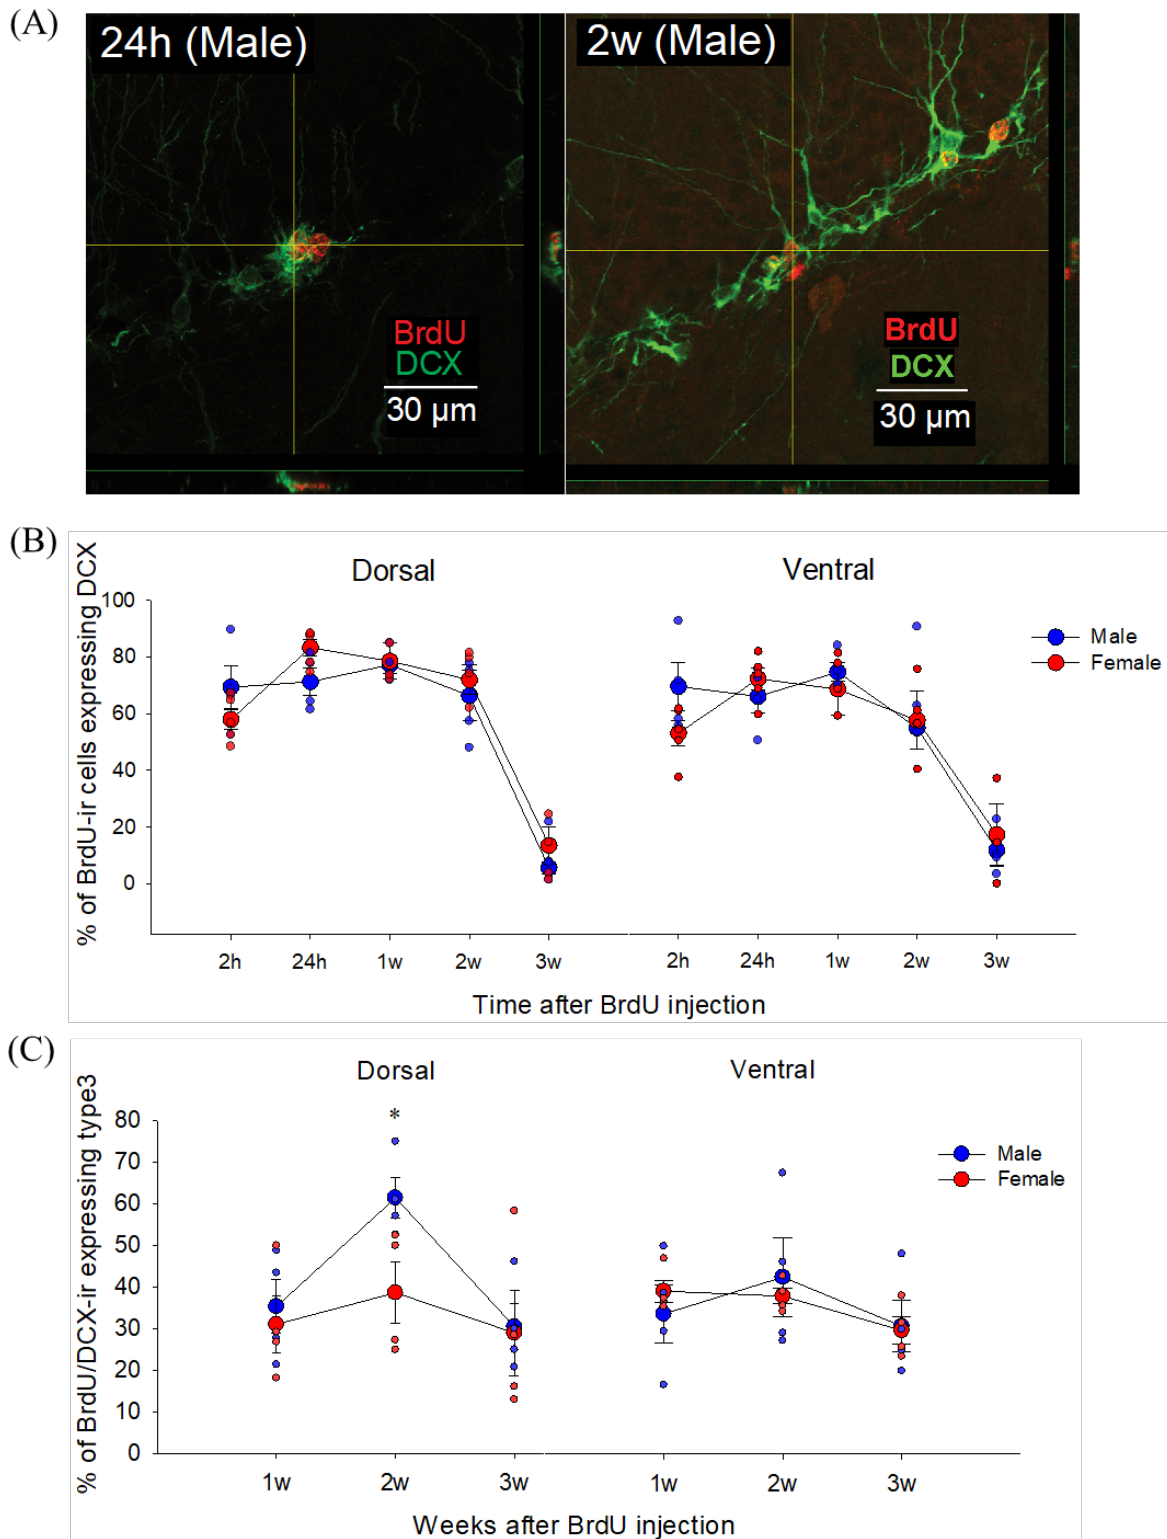

794 Figure 7

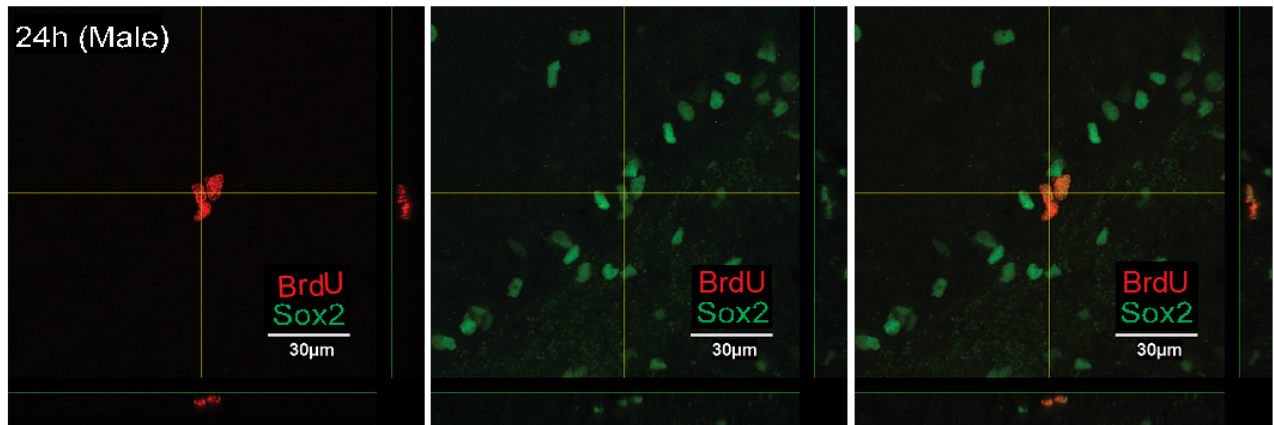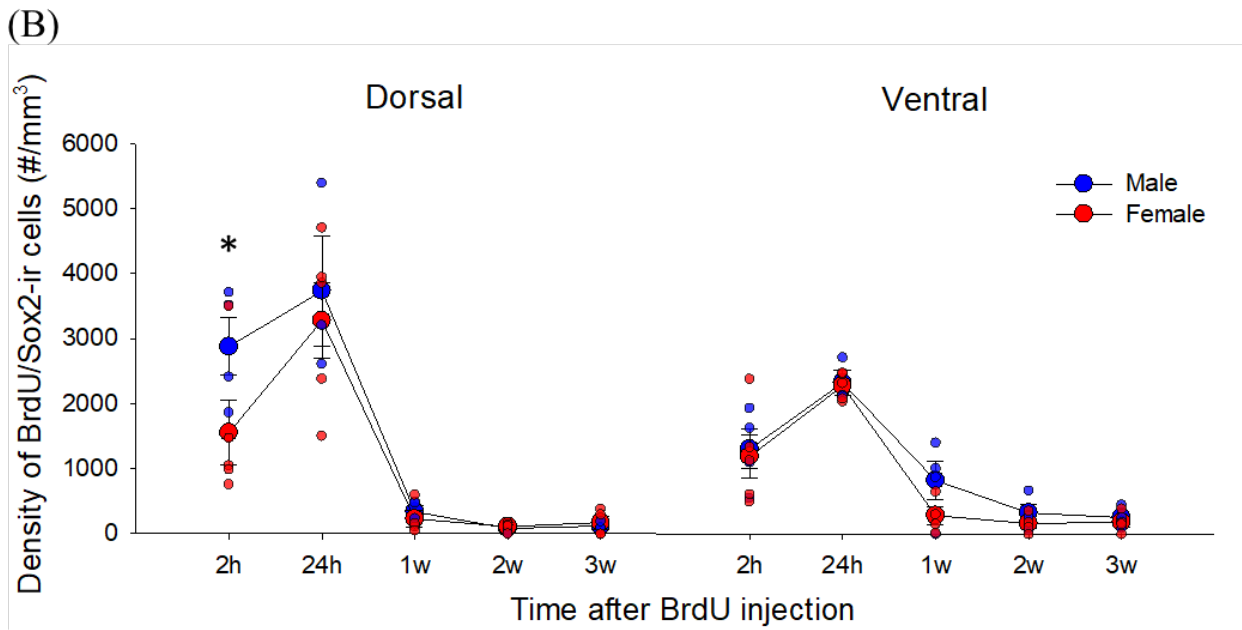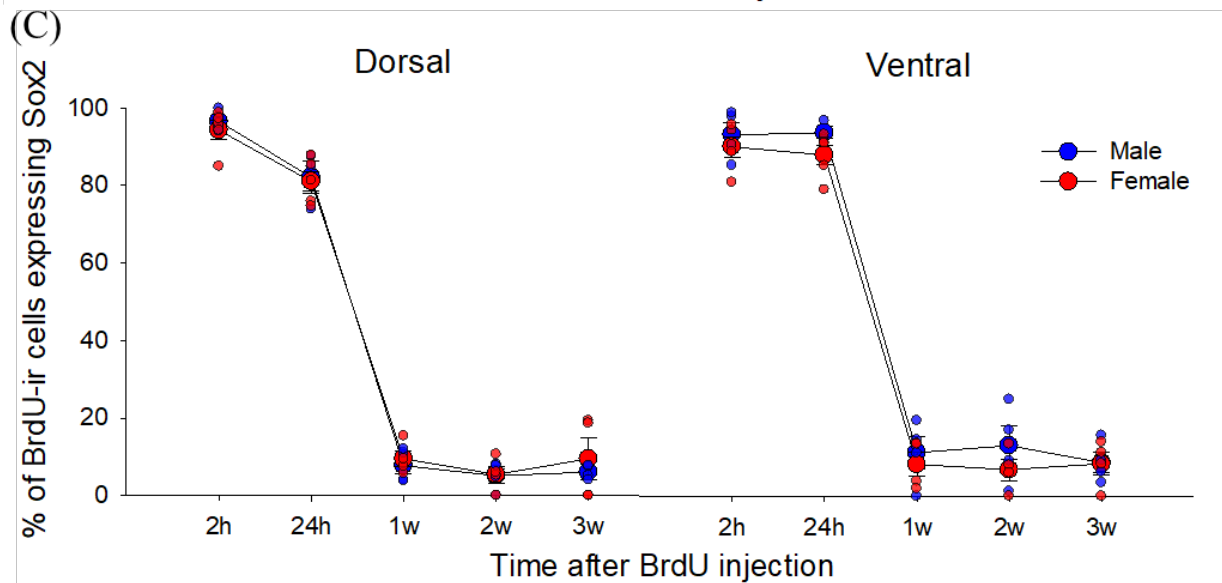

Source: https://www.biorxiv.org/content/10.1101/726398v3.full.pdf
